# Supplementary material
Source: PubMed Central journal article supplement (PMC6690743)

# Proteomics reveals NNMT as a master metabolic regulator of cancer associated fibroblasts

Supplementary Data: Full length immunoblots for all figures and extended data figures.

Fig. 2f

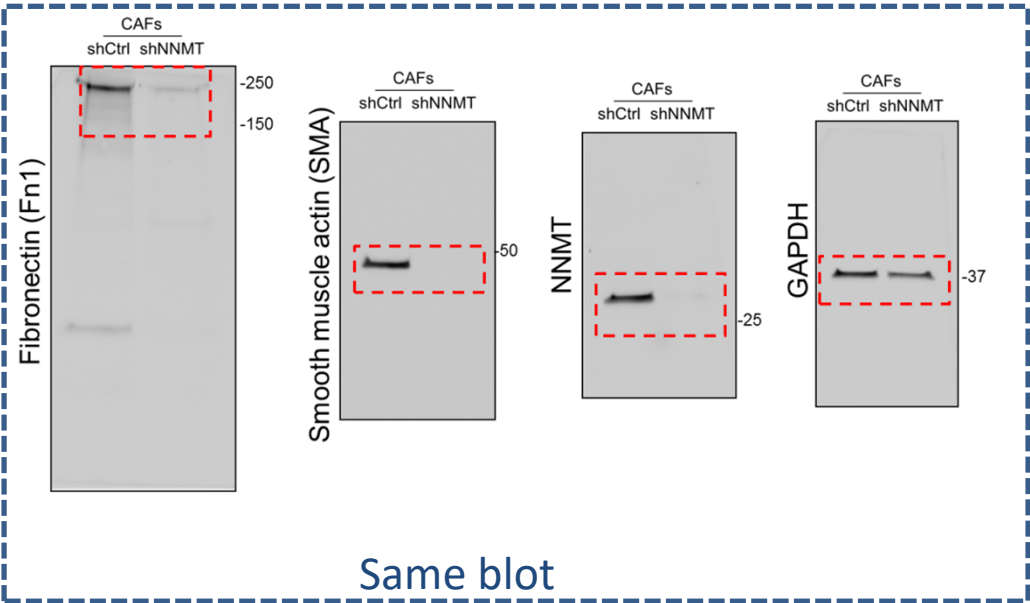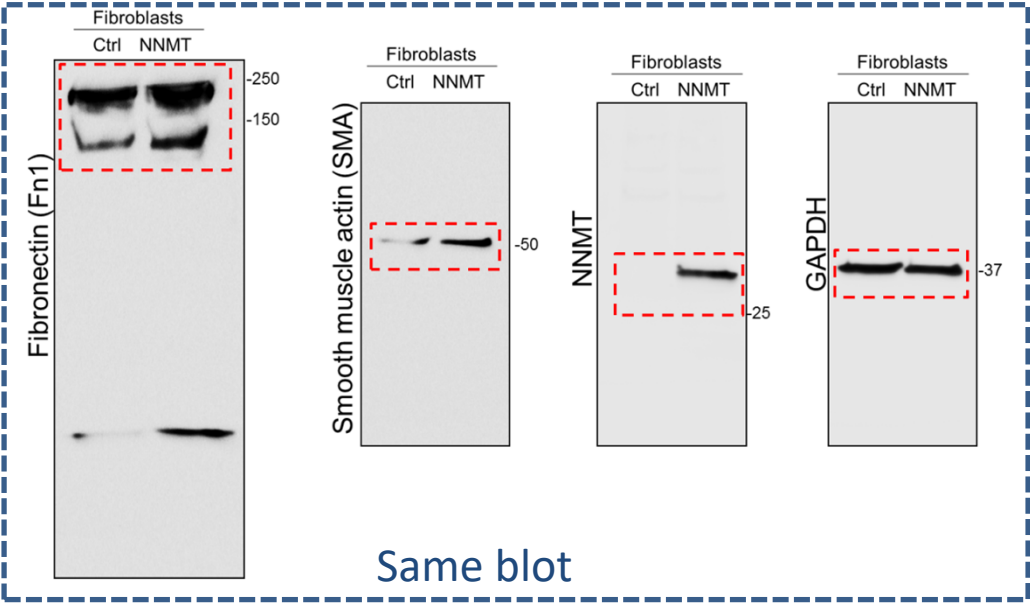

**Fig. 3d**

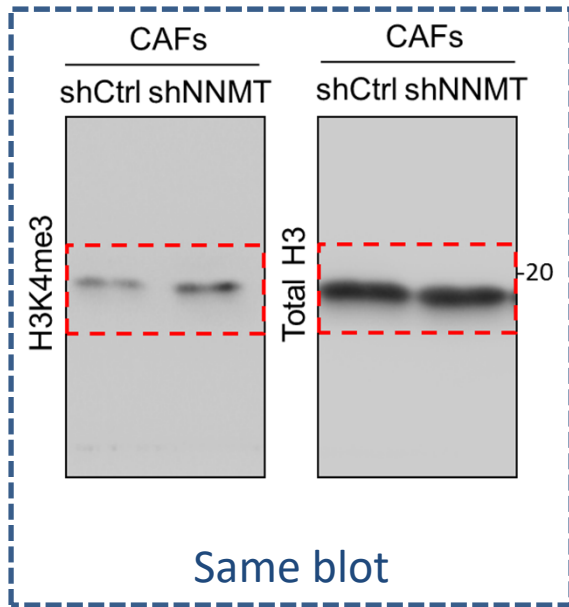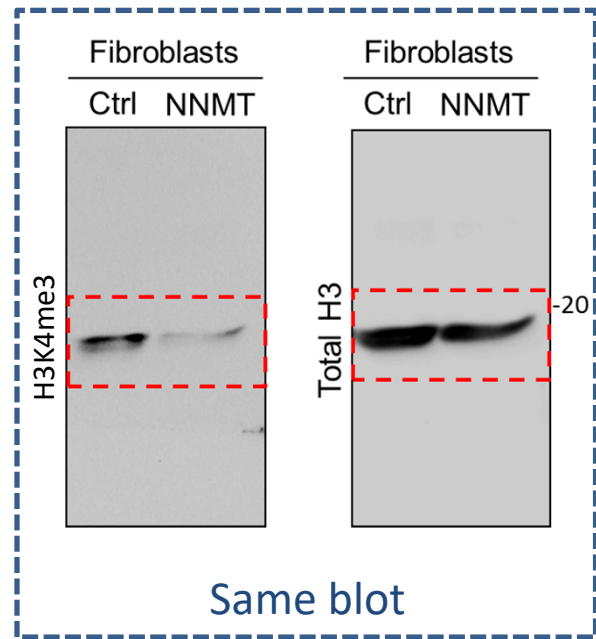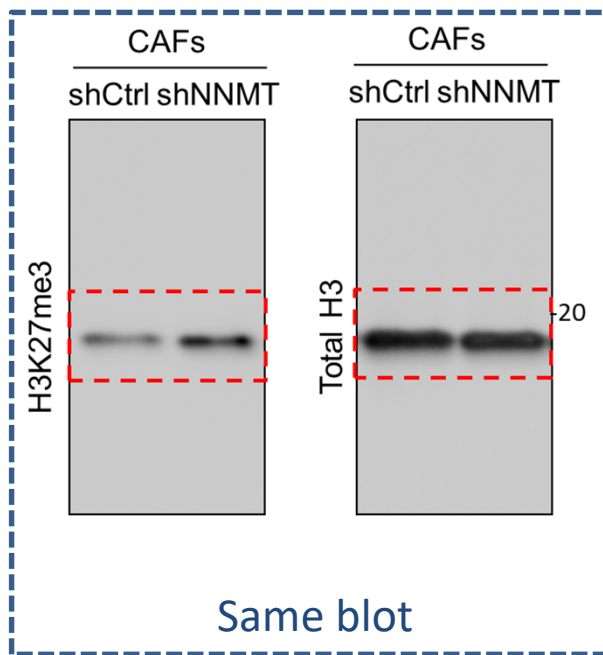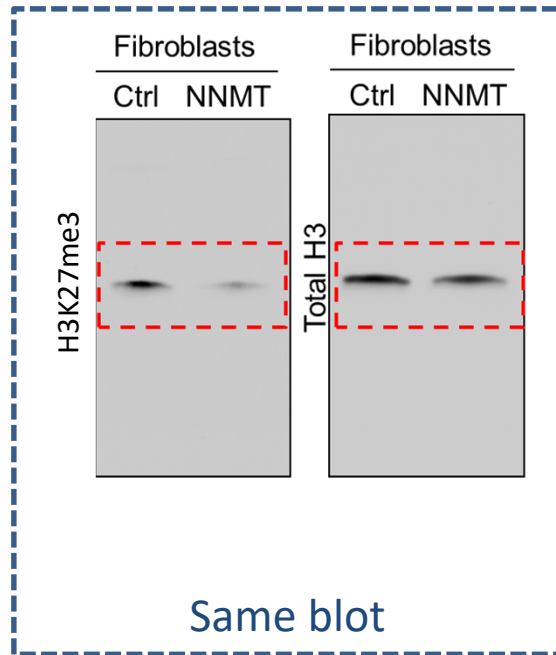

**Fig. 3g + Extended Data Figure 9b**

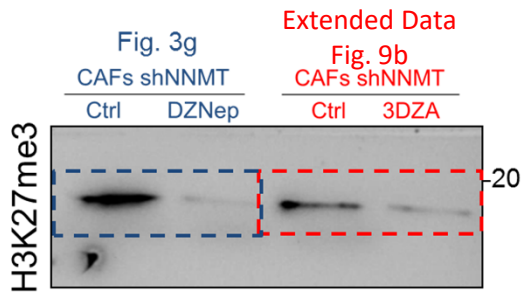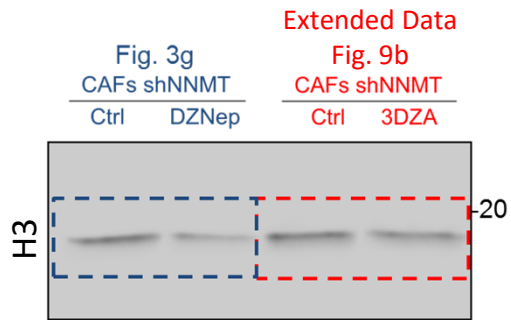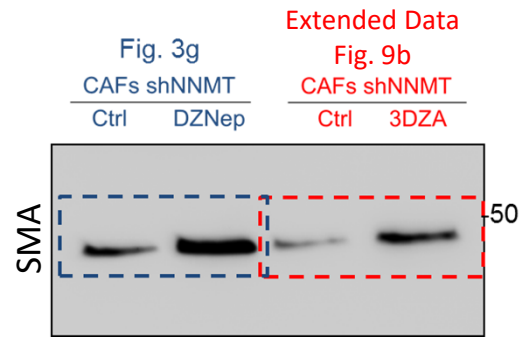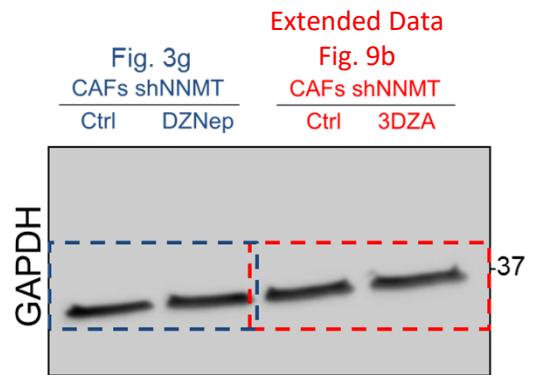

Same blot

Fig. 4d

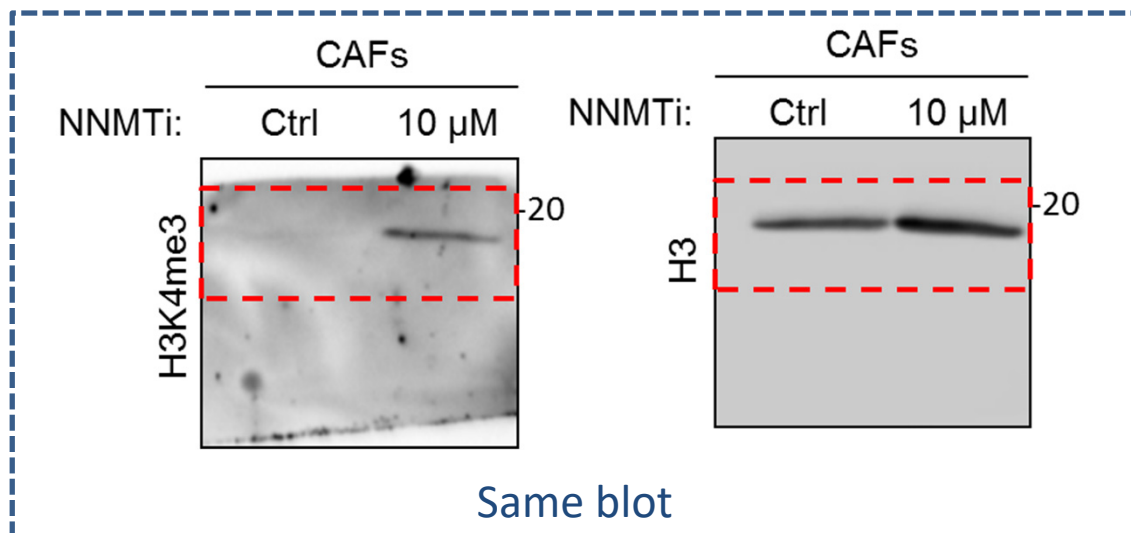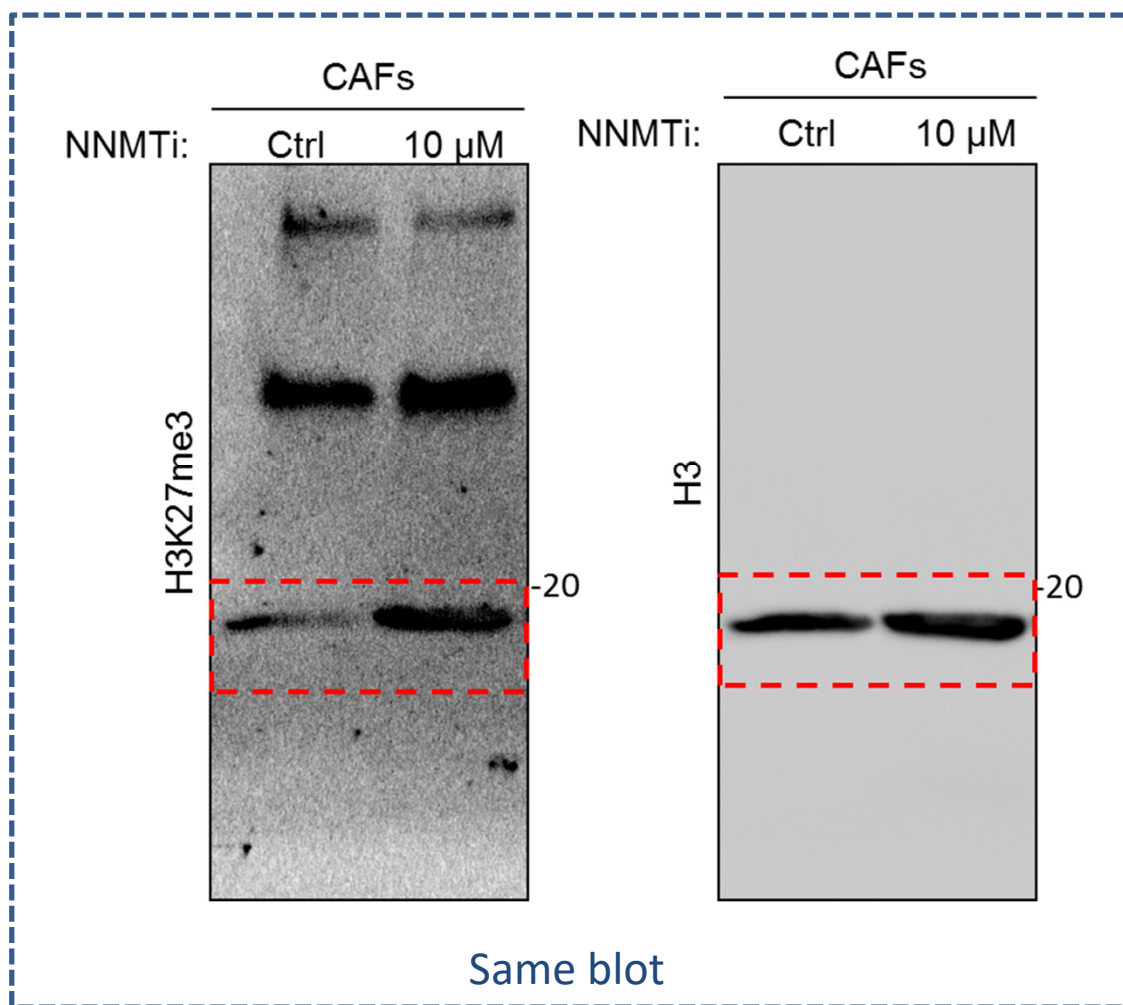

Extended Data Fig. 4e

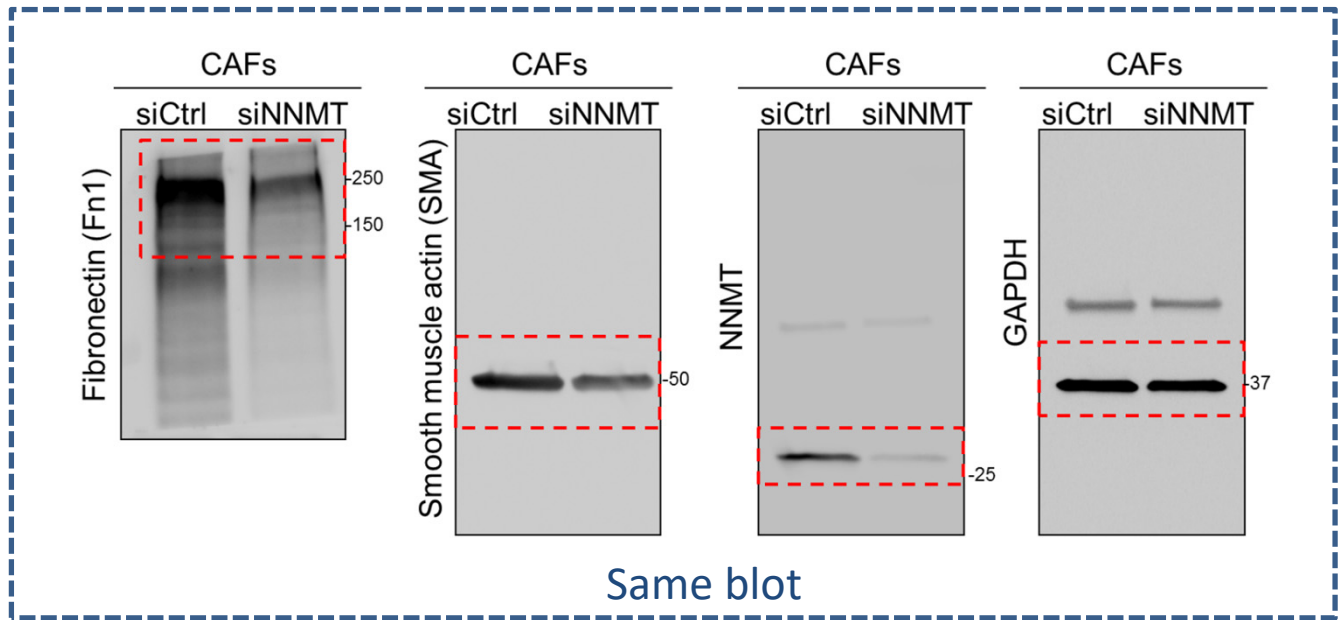

Extended Data Fig. 4f

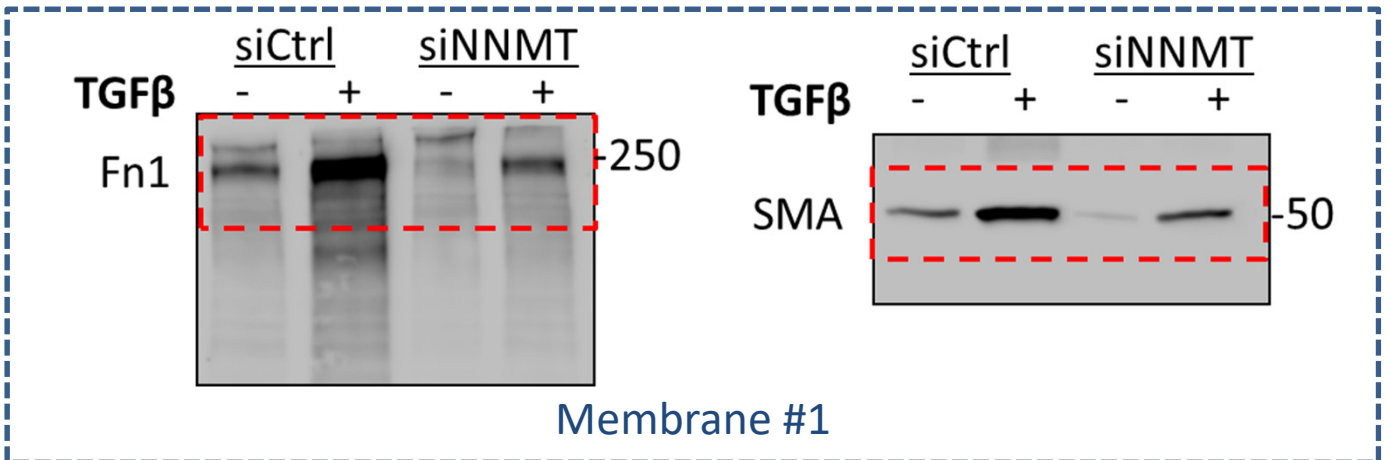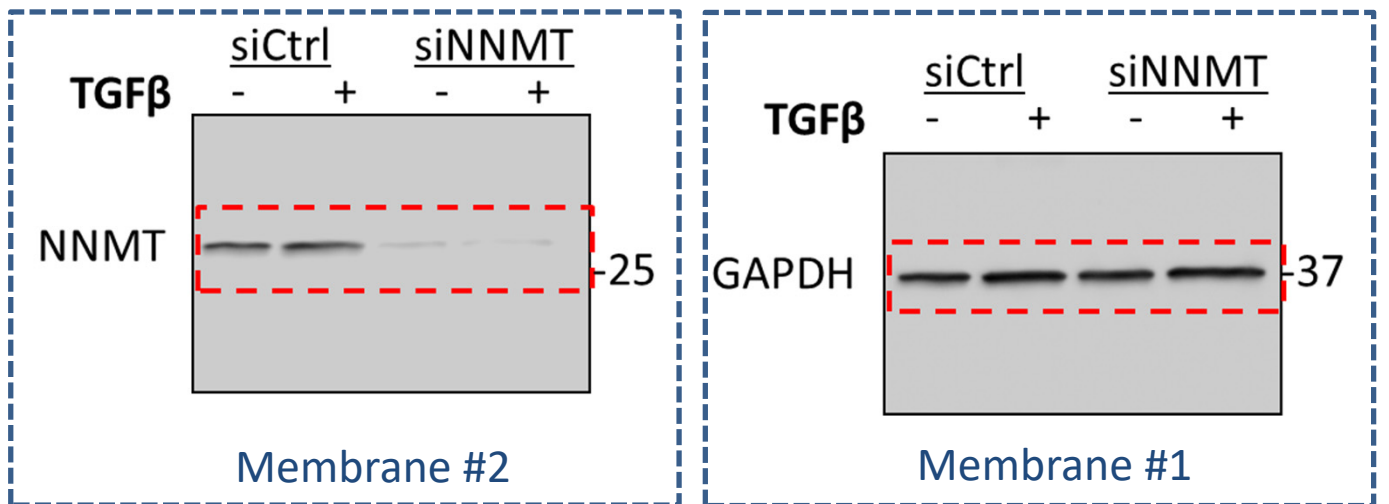

Extended Data Fig. 5d

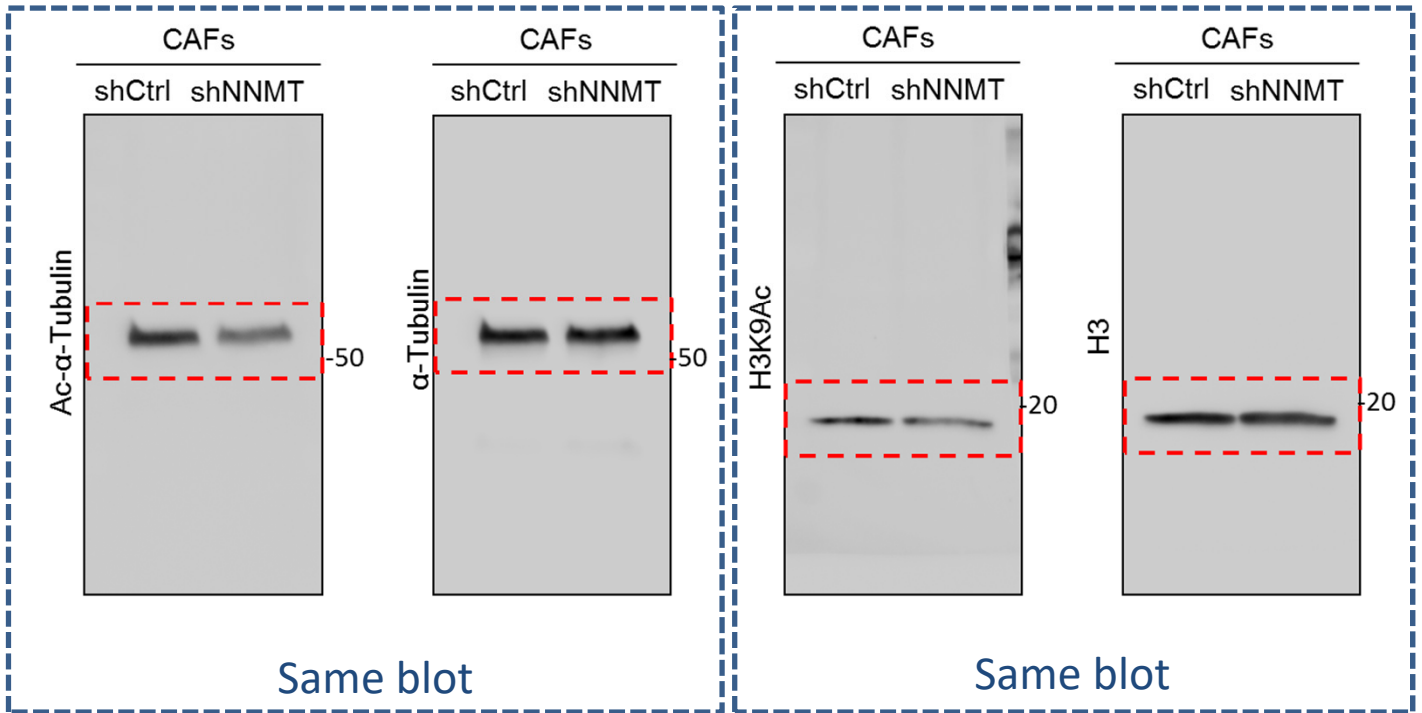

Extended Data Fig. 7c

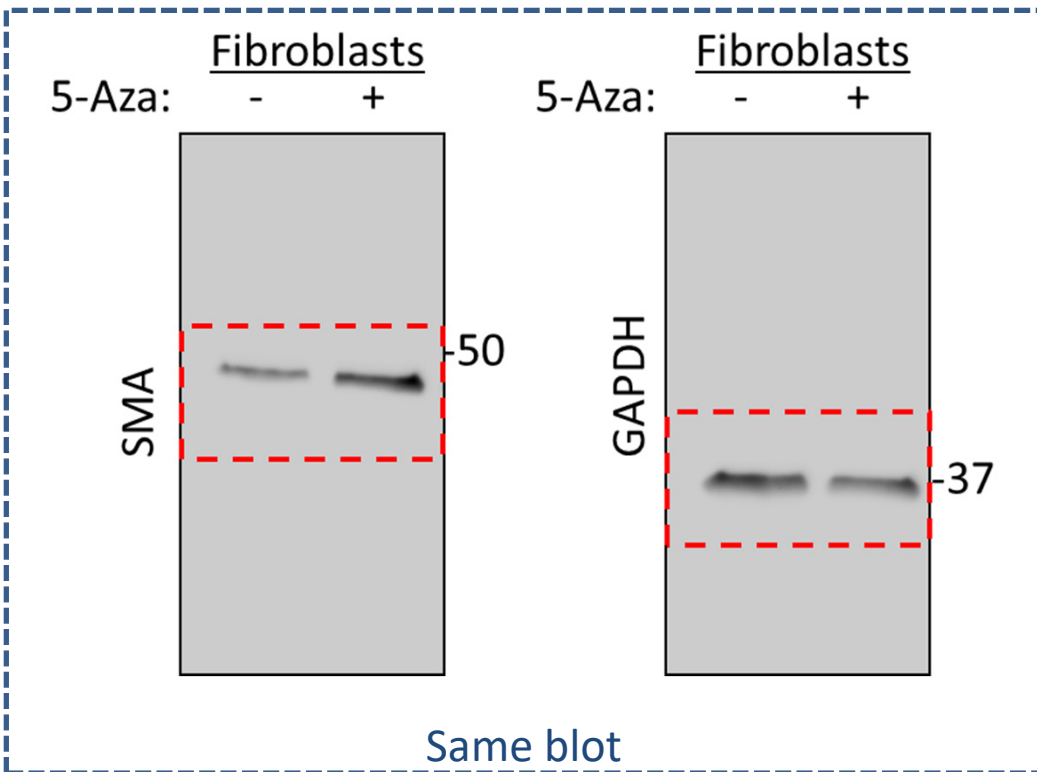

Extended Data Fig. 7e

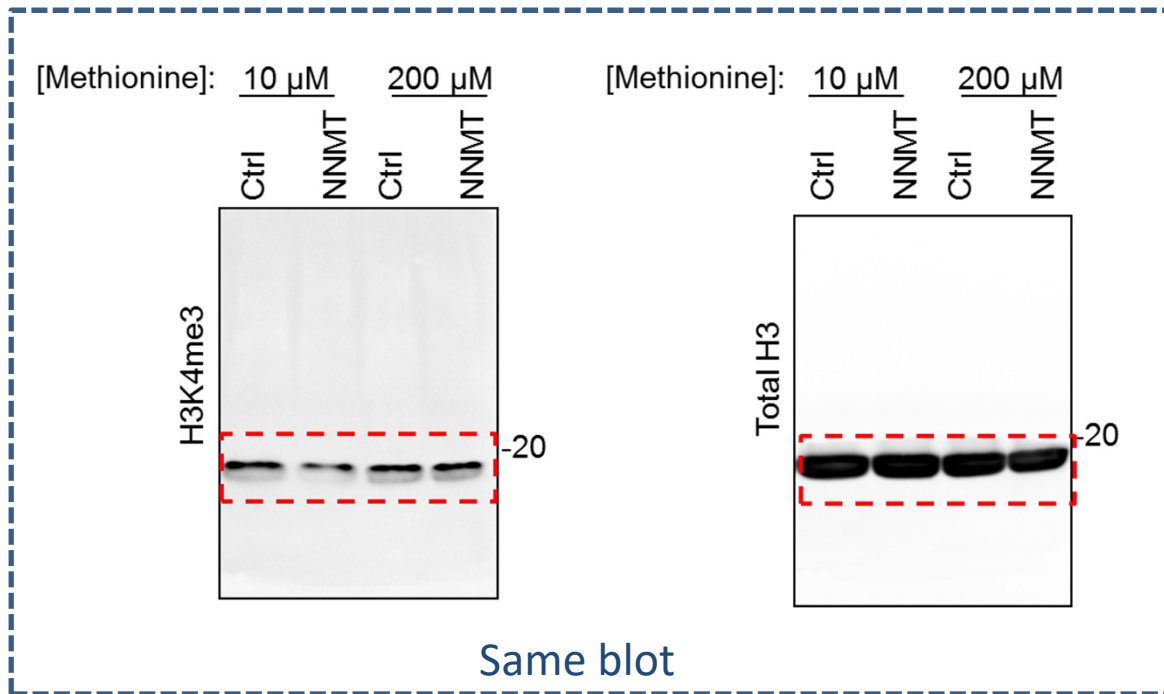

Extended Data Fig. 9c

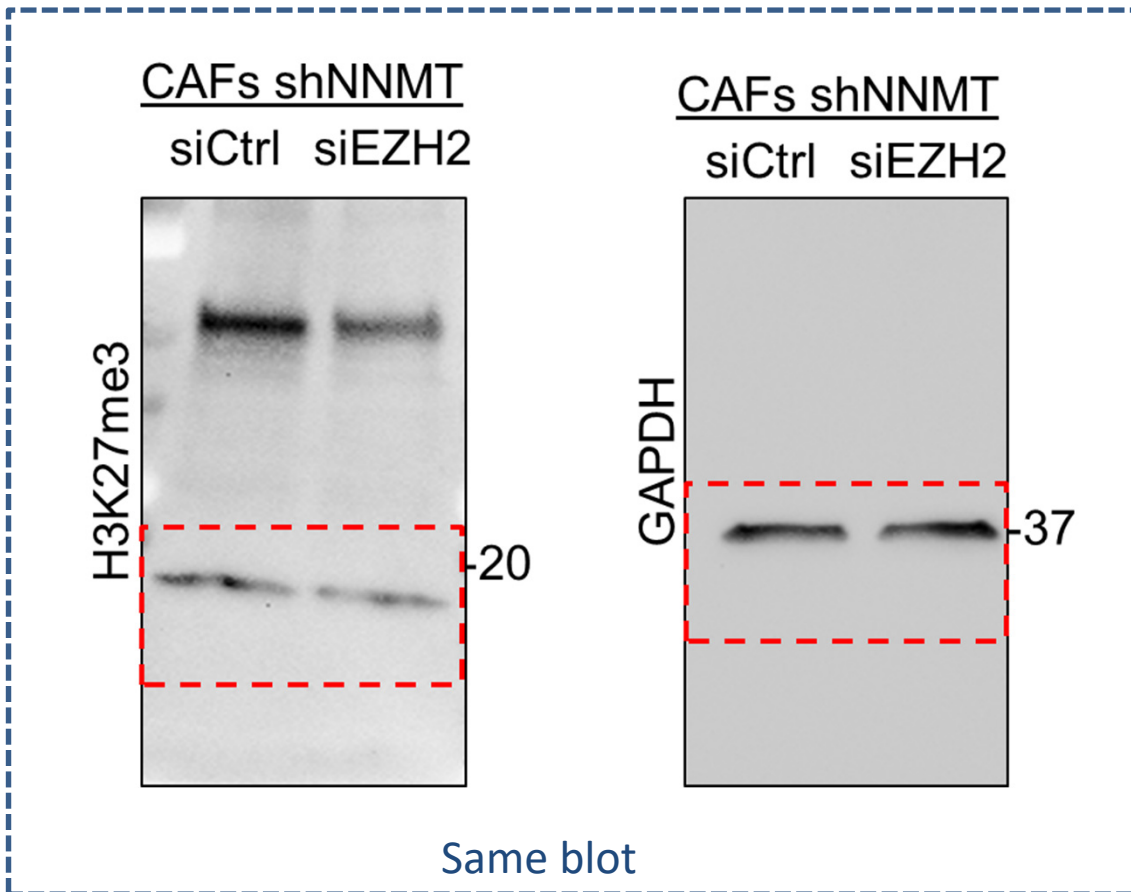

Extended Data Fig. 10b

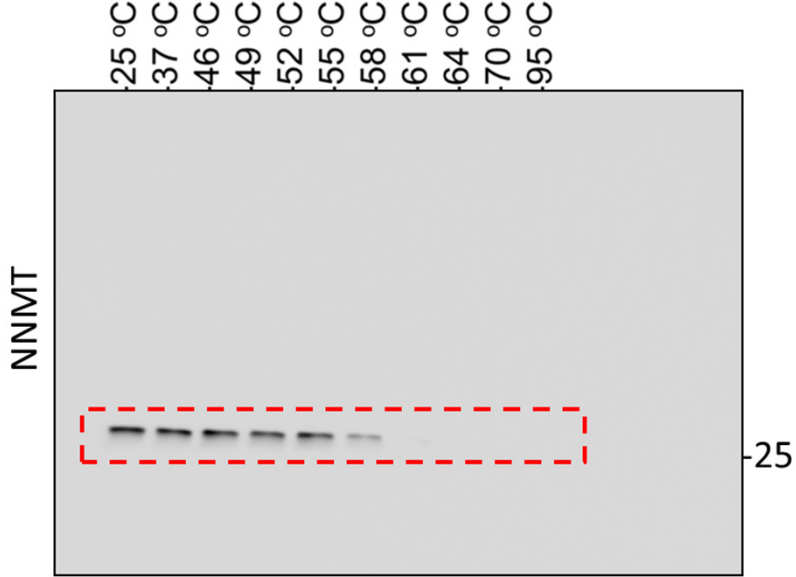

Extended Data Fig. 10c

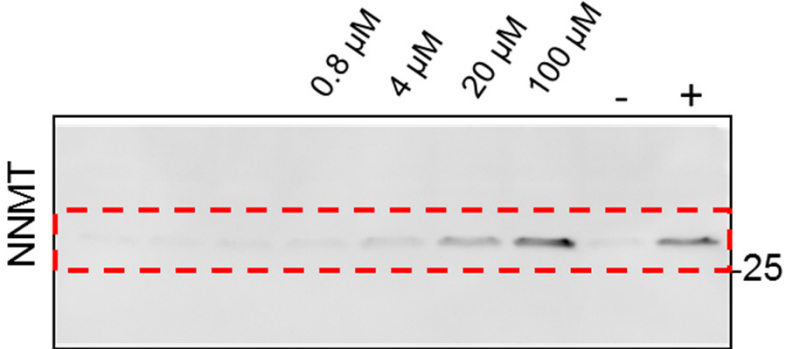



Extended Data Fig. 10d

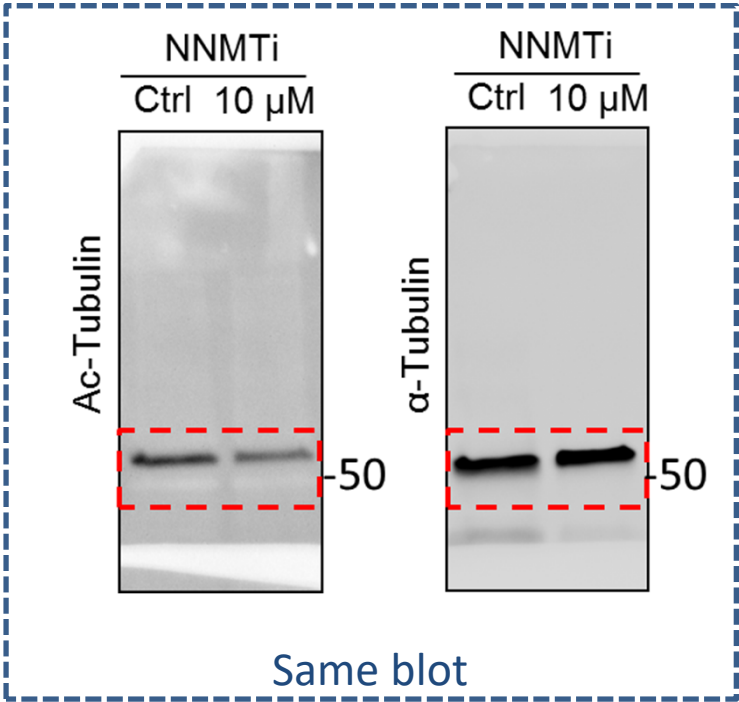

Extended Data Fig. 10f

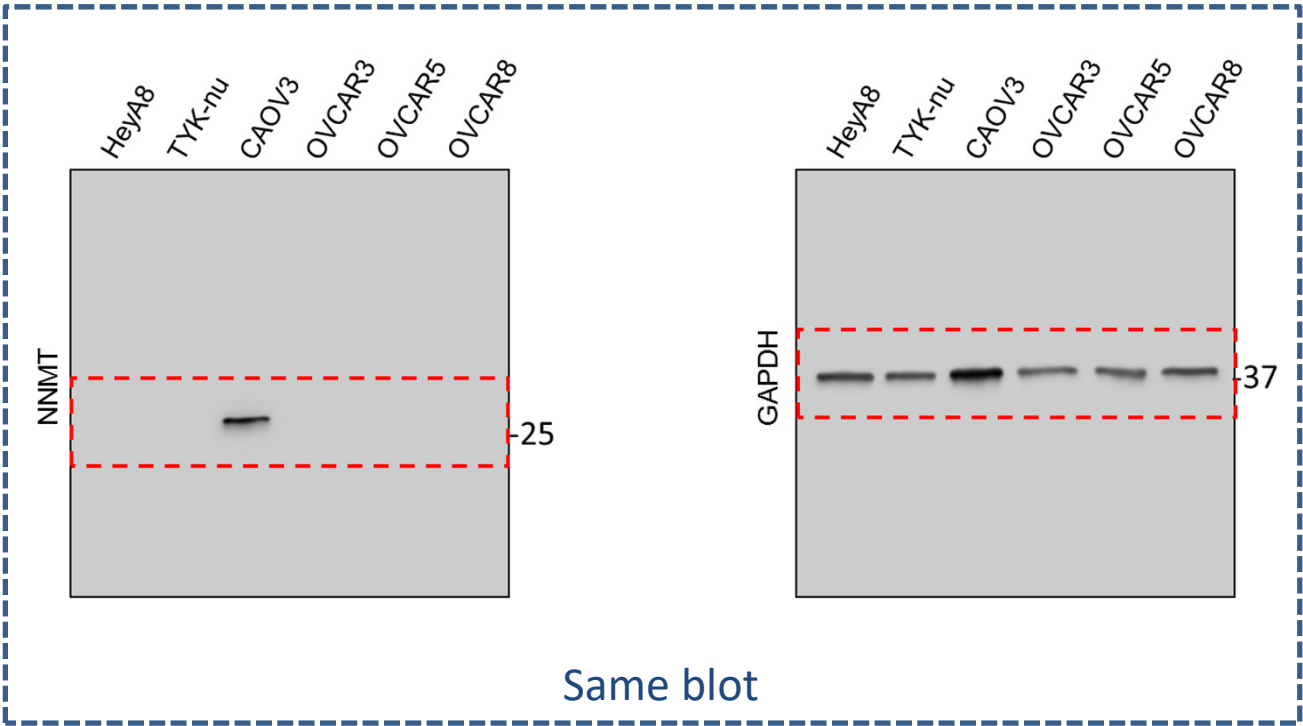

Supplement: NIHMS1525649-supplement-1.pdf [file NIHMS1525649-supplement-1.pdf]
